# Supplementary material for: NIBLSE: A Network for Integrating Bioinformatics into Life Sciences Education
Source: Atypon-hosted journal article supplement (doi:10.1187/cbe.15-06-0123), 2015-10-15
Supplement: combinedsupmats.pdf [file combinedsupmats.pdf]

# Supplemental Material

*CBE—Life Sciences Education*

Dinsdale *et al.*

## NIBLSE Conference Participants

| Name                         | Affiliation                                                    |
|------------------------------|----------------------------------------------------------------|
| Gita Bangera                 | Bellevue College (Washington)                                  |
| Vince Buonaccorsi            | Juniata College (Pennsylvania)                                 |
| Jennifer Drew*               | University of Florida                                          |
| Sarah Elgin*                 | Washington University in Saint Louis (Missouri)                |
| Linnea Fletcher              | Austin Community College (Texas)                               |
| Neal Grandgenett (evaluator) | University of Nebraska at Omaha                                |
| Anya Goodman*                | California Polytechnic State University                        |
| Charles Hauser               | St. Edwards University (Texas)                                 |
| Fran Lewitter*,†             | Whitehead Institute for Biomedical Research (Massachusetts)    |
| William Morgan (Co-PI)**     | College of Wooster (Ohio)                                      |
| Mark Pauley (PI)**           | University of Nebraska at Omaha                                |
| William Pearson              | University of Virginia                                         |
| Srebrenka Robic*             | Agnes Scott College (Georgia)                                  |
| Anne Rosenwald (Co-PI)**     | Georgetown University (Washington, D.C.)                       |
| Liz Ryder*                   | Worcester Polytechnic Institute (Massachusetts)                |
| Melissa Sayres               | University of California, Berkeley                             |
| Anca Segall                  | San Diego State University (California)                        |
| Michael Sierk*               | St. Vincent College (Pennsylvania)                             |
| Todd Smith                   | Digital World Biology                                          |
| Caroline St. Clair           | North Central College (Illinois)                               |
| William Tapprich*            | University of Nebraska at Omaha                                |
| Rafael Tosado-Acevedo        | InterAmerican University of Puerto Rico–Recinto Metro          |
| Eric Triplett (Co-PI)**      | University of Florida                                          |
| Lonnie Welch*,†              | Ohio University                                                |
| Jason Williams               | Cold Spring Harbor Laboratory (New York); iPlant Collaborative |
| Robin Wright                 | University of Minnesota                                        |

\*Steering Committee members; \*\*Leadership Team members; †Participated by distance
